1 **Original Manuscript**

2 **Title: Antiretroviral Adverse Drug Reactions Pharmacovigilance in Harare City,**

3 **Zimbabwe, 2017**

4 Hamufare Mugauri<sup>1</sup>, Owen Mugurungi<sup>2</sup>, Tsitsi Juru<sup>1</sup>, Notion Gombe<sup>1</sup>, Gerald

5 Shambira<sup>1</sup>, Mufuta Tshimanga<sup>1</sup>

6

7 1. Department of Community Medicine, University of Zimbabwe

8 2. Ministry of Health and Child Care, Zimbabwe

9

10 Corresponding author:

11 Tsitsi Juru [tsitsijuru@gmail.com](mailto:tsitsijuru@gmail.com)

12 Office 3-66 Kaguvi Building, Cnr 4<sup>th</sup>/Central Avenue

13 University of Zimbabwe, Harare, Zimbabwe

14 Phone: +263 4 792157, Mobile: +263 772 647 465

15 **Abstract**

16 **Introduction:** Key to pharmacovigilance is spontaneously reporting all Adverse Drug  
17 Reactions (ADR) during post-market surveillance. This facilitates identification and  
18 evaluation of previously unreported ADR's, acknowledging the trade-off between  
19 benefits and potential harm of medications. Only 41% ADR's documented in Harare  
20 city clinical records for January to December 2016 were reported to Medicines  
21 Control Authority of Zimbabwe (MCAZ). We investigated reasons contributing to  
22 underreporting of ADR's in Harare city.

23  
24 **Methods:** A descriptive cross-sectional study and the updated Centers for Disease  
25 Control (CDC) guided surveillance evaluation was conducted. Two hospitals were  
26 purposively included. Seventeen health facilities and 52 health workers were  
27 randomly selected. Interviewer-administered questionnaires, key informant interviews  
28 and WHO pharmacovigilance checklists were used to collect data. Likert scales were  
29 applied to draw inferences and Epi info 7 used to generate frequencies and  
30 proportions.

31  
32 **Results:** Of the 52 participants, 32 (61.5%) distinguished the ADR defining criteria.  
33 Twenty-nine (55.8%) knew system's purpose whilst 28 (53.8%) knew the reporting  
34 process. Knowledge scored average on the 5-point-Likert scale. Thirty-eight (73.1%)  
35 participants identified ADR's following client complaints and nine (1.3%) enquired  
36 clients' medication response. Forty-six (88.5%) cited non-feedback from MCAZ for  
37 underreporting. Inadequate ADR identification skills were cited by 21 (40.4%)  
38 participants. Reporting forms were available in five (26.3%) facilities and reports  
39 were generated from hospitals only. Forty-two (90.6%) clinicians made therapeutic  
40 decisions from ADR's. Averaged usefulness score was 4, on the 5-point-Likert scale.  
41 All 642 generated signals were committed to Vigiflow by MCAZ, reflecting a case  
42 detection rate of 4/ 100 000. Data quality was 0.75-1.0 (WHO) and all reports were  
43 causally assessed.

44  
45 **Conclusion:** The pharmacovigilance system was useful, simple, and acceptable  
46 despite being unstable, not representative and not sensitive. It was threatened by  
47 suboptimal health worker knowledge, weak detection strategies and referral policy  
48 preventing ADR identification by person place and time. Revisiting local policy,  
49 advocacy, communication and health worker orientation might improve  
50 pharmacovigilance performance in Harare city.

51  
52 **Keywords:** Pharmacovigilance, Postmarket Product Surveillance, Adverse drug  
53 reaction, Antiretroviral agents

54

55

56

## 57 **Introduction**

58 Pharmacovigilance (PV) is the practice of monitoring the effects of medical drugs  
59 after they have been licensed for use, in order to identify and evaluate previously  
60 unreported adverse drug events (ADE) and reactions (ADR) (1). This is in recognition  
61 of the trade-off between the benefits and the potential harm of all medications (2).  
62 Rapidly increasing antiretroviral therapy (ART) access globally, has transformed HIV  
63 infection into a chronic, manageable condition with prolonged survival times (3).  
64 Consistent with typical chronic therapy, drug-related toxicities remain a major  
65 challenge in resource-constrained settings due to a limited formulary for mitigation  
66 and inadequately trained personnel (4). Treatment-limiting drug toxicities are  
67 resulting in an added layer of complexity in the management of HIV by impairing  
68 patient adherence to treatment, leading to inferior clinical outcomes and higher cost to  
69 the public health system (5).

70 The Medicines Control Authority of Zimbabwe (MCAZ) which houses the National  
71 Pharmacovigilance Centre, derives its mandate from the Medicines and Allied  
72 Substances Control Act (MASCA), Chapter 15:03, enacted in 1997 (6). This  
73 legislation provides the impetus for MCAZ's stewardship role in regard to medicines  
74 licensure and regulation in the country. The main thrust being ensuring improved  
75 patient care and safety during medical and paramedical interventions, thereby  
76 improving public health and safety in relation to the use of medicines. In addition, the  
77 system promotes understanding, education and clinical training in pharmacovigilance  
78 and its effective communication to the public (7). The operations of the Centre are  
79 guided by WHO guidelines for setting up and running a national pharmacovigilance  
80 Centre. In this regard, the Zimbabwe National Pharmacovigilance Policy and  
81 Guidelines serve as a handbook for pharmacovigilance activities in the country (8).

82 The bedrock of pharmacovigilance systems, that aim to improve medicinal products  
83 safety, is prompt, spontaneous reporting of adverse drug reactions (ADRs) as a key  
84 step to their mitigation as well as updating the drug information database (9–11). It is,  
85 therefore, a mandatory requirement for health care providers to timely report all  
86 suspected and confirmed ADRs. This is particularly imperative in Zimbabwe, where  
87 the treat all strategy is being implemented, since June 2016, and has resulted in the  
88 number of people on HIV treatment rapidly increasing (12).

89 A preliminary review of ADR data for ARV's from Harare City which was reported  
90 through the MCAZ and through Opportunistic Infections (OI) records, captured  
91 between 01 January and 31 December 2016 was conducted. A 41% discrepancy was  
92 discovered in these two reporting systems, with more cases appearing in OI records  
93 than what was reported to MCAZ (6). This indicated poor reporting practices that  
94 impede accurate quantification of the prevalence of ADR'S. Failure to detect and  
95 report adverse drug reactions compromises patient safety and results in missed  
96 opportunities to update drug safety profiles. It is within this background that we  
97 evaluated the ADR surveillance system in Harare City in order to identify the reasons  
98 for underreporting and recommend solutions.

99 **Figure 1: The ARV ADR Surveillance Flow Diagram**

100 When an ADR case is suspected or confirmed, an in-house reference number is  
101 assigned. The data collected and entered into the standard reporting form should be  
102 checked for completeness. Additional information and clarifications should be  
103 solicited from the reporter before the report is filed. Once done, a completed form  
104 should be submitted to MCAZ within 14 days for spontaneous reporting (SR).  
105 Meanwhile, corrective interventions will be of course. At MCAZ, received reports  
106 are transferred to the MCAZ reporting form to be tabulated for causality assessment at

107 the next seating of the pharmacovigilance and clinical trials (PVCT) meeting. The  
108 causality assessment process involves analysis of the reaction against a set of key  
109 aspects that include the strength of the association, consistency of the observed  
110 evidence, temporality, dose-response and identification of possible confounders  
111 [13].The recommendations derived from this meeting are then implemented, which  
112 may be a request for further information where clarity is desired and informing  
113 healthcare facilities of findings. The data is also uploaded into Vigiflow database,  
114 including causality assessment outcome and case summary reports.

115

## 116 **Materials and Methods**

117 We conducted a descriptive cross-sectional study and surveillance system evaluation  
118 using updated CDC guidelines for surveillance system evaluation as a mixed method.  
119 Health Personnel involved in the ARV-ADR surveillance system were randomly  
120 selected to participate in the evaluation. These included doctors, pharmacists, nurses  
121 and pharmacy technicians. Harare City's two hospitals were purposively selected for  
122 the study and seventeen out of 38 clinics were randomly selected for the study. At the  
123 hospitals, all available health workers (nurses, pharmacists and doctors) working in  
124 OI clinics were recruited as study participants. The sister in charge, pharmacist and  
125 doctor at the OI clinics and hospitals were purposively recruited for the study. From  
126 the clinics, nurses who were found on duty on the day of data collection were selected  
127 for the study. All data records on reported ART ADR's for the period under study  
128 were reviewed at MCAZ and triangulated with data from the facilities.

129 Using Dobson formula:  $n = Z_a^2 (p) (1-p)/\delta^2$ , where  $Z_a=1.96$ ,  $p=0.5$ , assuming that  
130 50% of health workers interviewed had adequate knowledge, at 20% precision and

131 80% power, a sample size of 47, adjusted for 10% non-response rate, sample size of  
132 52 was reached.

133 A pre-tested interviewer-administered questionnaire was used to interview the health  
134 workers to determine their knowledge of the operations and usefulness of the  
135 surveillance system. The variables assessed on health worker knowledge included: the  
136 ability to accurately enumerate the key elements of an ADR, (a noxious response,  
137 unintended, at therapeutic dosage), sequentially relating the entire ADR reporting  
138 process, the purpose and the role of MCAZ in ADR Surveillance. The quality of the  
139 data generated was scored in relation to completeness, consistent with WHO  
140 evaluation criteria.

141 A checklist was used to assess the system's stability. Records of all patients who were  
142 attended at the health facilities were reviewed to check on the number of ARV ADR  
143 cases documented and the number captured by the surveillance system and how many  
144 were missed. All notification forms from January to December 2016 were reviewed.  
145 Simplicity, data quality, completeness, acceptability, sensitivity, timeliness and  
146 representativeness of the system were evaluated. Epi Info<sup>TM</sup> was used to compute  
147 frequencies, means, and proportions. The checklist for PV indicators was evaluated  
148 according to WHO score values.

149

150 Permission to carry out the study was obtained from the Institutional Ethical clearance  
151 boards for the Medicines Control Authority of Zimbabwe (MCAZ), Harare city and  
152 Ministry of Health and Child Care, Written informed consent was obtained from key  
153 informants.

154

155

## 156 **Results**

### 157 **Demographic characteristics**

158 The study successfully recruited 52 Health workers as study participants, yielding  
159 100% response rate. Of the 52 participants recruited, 73% (n=38) were females. The  
160 majority (75%) of the participants were Registered General Nurses (RGNs). The  
161 median years of service of all participants were 9years ( $Q_1= 7, Q_3= 12$ ). **(Table 1.)**

### 162 **Health Worker Knowledge of ARV ADR Surveillance**

163 Varied proportions of respondents gave accurate responses to each variable assessed  
164 on health worker knowledge. The total score was then rated using a 5-point Likert  
165 scale which ranged from very poor, poor, fair, and good to very good. Overall,  
166 knowledge was rated as fair.

### 167 **System Attributes**

#### 168 **Data Quality**

169 Data quality obtained a score range of .75-1.0, according to WHO derived from  
170 country records that were committed to WHO Vigiflow. Observed completeness of  
171 available forms from the sites was consistent with the national score.

#### 172 **Simplicity**

173 Out of the 52 participants, only 12 (29.4%) had ever completed an ADR form.  
174 Reported average time taken to complete AR forms, by those who had done so before  
175 was 14 minutes. However whilst being timed, participants took an average of 7-9  
176 minutes 7/12 (19.6%) participants reported that the forms were easy to complete, and  
177 10 out of 12 accurately outlined the entire reporting process for ADR's. Forty-three  
178 (82.7%) stated that they needed formal training to be able to fill the notification  
179 forms. All ADR cases were referred to Wilkins and Beatrice road hospitals were  
180 reports are generated and submitted.

181 **Acceptability**

182 90.4% of the participants felt that it was their duty to complete the ADR forms and

183 92.3% participants were willing to continue participating in the ADR surveillance.

184 Thus based on the subjective assessment gathered from the interview, on average,

185 ADR surveillance is 91.4% acceptable to health workers in Harare City.

186 **Stability**

187 Twenty-one (40.4%) of the participants reported that they had ADR case definitions

188 in their Health facilities. However only two out of 19 (10.5%) health facilities had the

189 ADR case definition displayed. Five (26.3%) health facilities had ADR forms

190 available in their workstations. Thirteen (25%) of the participants knew about the

191 2016 invented online reporting facility, but none had ever used it due to computer,

192 Internet and knowledge challenges. One health facility (Wilkins hospital) had

193 accessible, facility-level ADR record. All facilities had a working phone for

194 communication.

195 **Usefulness- Perceptions of ADR Surveillance System, Harare City, 2017**

196 Overall 69.2% of the participants used ADR data in patient management whilst 13.5%

197 said they held review meetings for ADR's. There was no evidence of minutes to the

198 referred meetings. Clinicians made therapeutic decisions using ADR data, such as

199 switching to next line regimen. Applying the 5 points Likert scale on the resultant

200 usefulness score, ADR pharmacovigilance was somewhat useful with an average

201 score of 64.5%. **(Table 2.)**

202 **Representativeness**

203 The system was not representative. The City Council imposed protocol of referring

204 ADR's to their two hospitals results in an overestimation of reports generated by the

205 hospitals, at the same time underestimating the prevalence of ADR's within the



206 community health facilities by person place and time. Many ADR's are not being  
207 reported for fear of writing reports as required by the City health department.

### 208 **Timeliness of the ARV ADR Surveillance System in Harare City, 2017**

209 Severe and Moderate reactions were all (100%) reported to the authority on time  
210 (within 48 hours), entirely from the two hospitals. Mild and Incidental reactions were  
211 all (100%) treated according to facility protocol before completion and submission of  
212 the forms within 14 days.

### 213 **The sensitivity of the ADR Surveillance System in Harare City, 2017**

214 Individual Case Safety Reports (ICSRs) received by MCAZ amounted to 642,  
215 reflecting a case detection rate of 5/ 100 000, calculated using the national population  
216 of 14 million in 2015. All received reports were tabled at PV and clinical trials  
217 committee meetings and feedback submitted to the city health authorities. We  
218 observed that 86% of the Targeted Spontaneous Reports (TSR) received since 2012  
219 and authenticated by MCAZ were committed to the WHO Vigibase, termed Vigiflow  
220 as at 31 December 2016. Notably, 10 cases of product defects were reported in 2016,  
221 seven of which were subsequently recalled by the authority. More than 1900 adverse  
222 drug reaction cases, termed signals, were reported and the most common ones  
223 included gynecomastia, drug-induced liver injury, steven johnson syndrome,  
224 lipodystrophy and renal toxicity.

225 We further observed that 119 health facilities, countrywide, actively reported ADR's  
226 (Sept 2012 to Dec 2016), yet only 32 of these facilities submitted ADR reports in  
227 2015. This indicator is qualified by submission of  $\geq 10$  reports annually to the  
228 pharmacovigilance centre. The pharmacovigilance unit met the minimum  
229 requirements of a regulatory authority, according to WHO standards. **(Table 3.)**

230

231 **ARV ADR detection Strategies in Place, Harare City, 2017**

232 Thirty-eight (73.1%) participants indicated that they detected ADR's following client  
233 complaints, whilst 21(40.4%) identified ADR's during clients routine review visits  
234 and examinations. Nine (17.3%) enquired clients how they were responding to  
235 treatment, whereas 34(65.1%) only identified ADR's following clients' failure to  
236 tolerate treatment and have defaulted.

237 **Reasons for underreporting of ARV ADR's, Harare City, 2017**

238 Whereas MCAZ is mandated to feedback on outcomes of all reported ADR's,  
239 46(88.5%) of the participants stated that None response by MCAZ to reported ADR's  
240 was the reason for under-reporting of ARV ADR's. Unavailability of reporting forms  
241 was cited 44, (84.6%) whilst 33 (63.5%) thought weak incident detection strategies  
242 was the reason for under-reporting. **(Table 4.)**

243 **Discussion**

244 The data generated from the few reporting sites was of good quality in regard to  
245 completeness. A score of 0.75-1.0 for a country with a pharmacovigilance system that  
246 is still under development is remarkable. This is contrary to findings by Nderitu et al  
247 (2011) in Kenya who found incomplete records as a major hindrance to causality  
248 assessments in a developing pharmacovigilance systems (3).

249

250 Health workers are supposed to be knowledgeable about the surveillance system so  
251 that they are able to identify and investigate suspected cases during their routine  
252 conduct of duty. Knowledge on ARV pharmacovigilance surveillance in regard to  
253 qualifying ADR's, the reporting process and the role of MCAZ was low in Harare  
254 City. This was despite their recognition that reporting ADR's is within their scope of  
255 practice, accepting the responsibility. It was noted that the majority of the health

256 workers were not trained (formally or on-the-job) on ARV, ADR surveillance  
257 although pharmacovigilance is a component of ART management, for which all  
258 health workers are oriented on. Poor knowledge contributed to the poor performance  
259 of the system.

260

261 The City Council imposed protocol of referring all suspected ADR's instead of  
262 reporting directly to MCAZ resulted in it being impossible to assess the incidence  
263 and prevalence of ARV ADR's by person place and time. All reports were being  
264 generated from Wilkins and Beatrice road hospitals.

265

266 The ARV ADR's surveillance system in Harare city is simple. The few who filled the  
267 forms encountered no challenges. When MCAZ received suspected ADR reports, a  
268 pharmacovigilance and clinical trials committee sat to discuss and recommend  
269 causality assessment, particularly for peculiar reactions. All reports were responded to  
270 through the city health directorate for communication to reporting sites. However,  
271 health workers from reporting sites reported not receiving feedback, which  
272 demotivated them from continuous reporting. This was consistent with the findings of  
273 a study by Hall et al in Mpumalanga, South Africa, 2009 where feedback motivated  
274 continuous reporting of ADR's (13). If health workers lack motivation, no active  
275 detection mechanisms may be implemented to ensure identification of all DR's and  
276 their subsequent reporting.

277

278 Timeliness of a surveillance system is a key performance measure. However, in  
279 pharmacovigilance, reporting ADR's is preceded by immediate mitigation of the  
280 effects. Targeted spontaneous reporting (TSR) is the surveillance approach that has

281 prescribed timelines unlike the voluntary spontaneous reporting (SR) that was being  
282 evaluated which is supposed to be part of routine practice. MCAZ acknowledged  
283 reception of ADR forms within the recommended 14-day window to facilitate  
284 causality assessments. This is contrary to findings by Bate et al in Reo de Janeiro,  
285 2012, who identified challenges with data transmission as an impediment to the  
286 timely reception of reports in resource-constrained environments (14).

287 All the participants stated that it was their duty to fill the notification forms and were  
288 willing to continue participating, hence the system was acceptable. However, the  
289 majority of the health workers stated that they needed training on case detection and  
290 on how to fill the notification forms. Similar findings were reported by Pirmohamed  
291 et al in Malawi, where none of the study participants was trained on ARV  
292 pharmacovigilance and this was attributed to the high staff turnover between 2007 and  
293 2009 (5).

294

295 Zimbabwe is compliant to the WHO minimum requirements of a functional  
296 pharmacovigilance system as stipulated by the core and complementary structural  
297 pharmacovigilance indicators (2015). The MCAZ, whose mandate is to ensure  
298 medicine safety through the institution of regulatory frameworks is compliant to  
299 WHO minimum pharmacovigilance indicators for a functional PV centre [14]. A total  
300 number of 642 reports were received by 31 December 2016, translating to 4/100 000  
301 people, having considered a population size of 15.6 million for 2015 which is a core  
302 pharmacovigilance indicator (CP1). This is remarkable for a developing PV centre.  
303 Exercising its regulatory mandate as envisaged by PV indicator C02, the authority,  
304 out of the 10 cases of product defects that were reported, 7 products were recalled.  
305 This was commendable as it fosters compliance to set regulations.

306 For a reporting facility to be a functional pharmacovigilance unit, it should submit  
307 submits  $\geq 10$  reports annually to the pharmacovigilance centre according to WHO PV  
308 indicator P1. Only 2 centres, Wilkins and Beatrice road Hospitals fit this category in  
309 Harare city and there were a total 119 centres countrywide as at 31 December 2016  
310 since 2012. However, in 2015 alone, only 32 health facilities submitted ADR reports  
311 countrywide. This reveals that there are facilities which were initially reported but  
312 have backtracked which is a cause for concern. There is, therefore, need to investigate  
313 what might have demotivated them from maintaining the set standards as this lowers  
314 the national performance.

315 Active ARV ADR detections entail enquiring from the client how they are responding  
316 to the treatment. This was found to be lacking among healthcare staff in Harare city,  
317 instead, most participants revealed that they were detecting ADR's from client  
318 complaints. Poor ARV ADR's detection in a city results in inaccurate quantification  
319 of the prevalence of ADR's in the postmarket surveillance period. Reasons  
320 highlighted for poor ARV ADR detection were a lack of knowledge and training  
321 among health workers, MCAZ introduced an online reporting on 1 September 2016  
322 but the facility remained unutilised due to lack of knowledge of its existence.

323

324 The ARV ADR surveillance system was reported to be useful although the majority  
325 lack knowledge on the surveillance system. Only one facility, Wilkins hospital had an  
326 available local database of all reported ADR'S which provided an opportunity for  
327 local utilisation of this data in programming.

328 The participants cited non-response by MCAZ to submitted reports as a major reason  
329 for under-reporting of ARV ADR's. On the other hand, MCAZ indicated 100%  
330 response to all submitted reports. Further analysis revealed that although MCAZ

331 responded to all submitted reports, the communication was conveyed through the City  
332 health directorate. Unfortunately, this communication was not being disseminated to  
333 report generating facilities. Unavailability of reporting forms, lack of appreciation of  
334 the importance of reporting ADR's and health workers being overwhelmed with other  
335 responsibilities were other reasons attributed to under-reporting. This is contrary to  
336 the scope of accepting ADR detection as part of routine clinical practice as indicated  
337 by the same participants which also consistent with findings by Wiholm et al, 2004 in  
338 Swaziland who identified lack of appreciation of the value of ADR reporting in the  
339 post-market surveillance period as a hindrance to reporting (14).

340

#### 341 **Conclusions**

342 We concluded that knowledge among health workers in the city was average and the  
343 quality of data generated and committed to Vigiflow was good. City council imposed  
344 protocol of referring suspected ADR's impeded reporting directly from facilities.  
345 Possible reasons for under-reporting ADR's were a lack of knowledge of health  
346 workers, weak incident detection strategies, local protocol and poor information  
347 dissemination within the council. Though MCAZ were responding to the reports, their  
348 responses were not being disseminated to report generating facilities. MCAZ was  
349 fulfilling its mandate of ensuring pharmacologic safety as envisaged by the minimum  
350 PV indicator compliance as well as exercising its regulatory authority by licensing  
351 and recalling defective medicines

352 The ADR pharmacovigilance system was therefore found to be useful, simple,  
353 acceptable, sensitive, unstable and not representative

354 We, therefore, recommended training of all untrained health workers involved in  
355 ADR pharmacovigilance. ADR case definitions and notification forms were

356 distributed to health facilities in the city which did not have these. The local authority  
357 was engaged, in liaison with MCAZ, for a possible review of the local policy and  
358 facilitate reporting of ADR's from detecting health facilities. MCAZ and Harare city  
359 directorate pledged to explore effective feedback dissemination mechanisms that will  
360 ensure all facilities receive feedback for reported ADR's

361

### 362 **Acknowledgements**

363 Special gratitude goes to my supervisors, Dr O. Mugurungi and Professor M.  
364 Tshimanga for their prodding and guidance throughout the study. I also appreciate Ms  
365 Tsitsi Juru who generously offered her assistance in the preparation of this project. I  
366 also express my gratitude to the Department of Community Medicine, University of  
367 Zimbabwe and Health Studies Office, Zimbabwe for all the help they rendered to me.  
368 Last, but not least, I would like to thank all the Masters in Public Health (MPH)  
369 colleagues for their assistance, my dear wife, son and daughter for the social support  
370 throughout the project.

371

372

373

374

375

376

377

378

379

380

381 **References**

- 382 1. WHO. Safety of Medicines - A Guide to Detecting and Reporting Adverse  
383 Drug Reactions - Why Health Professionals Need to Take Action [Internet].  
384 Essential Medicines and Health Products Information Portal - A World Health  
385 Organization resource. 2002. p. 16. Available from:  
386 <http://apps.who.int/medicinedocs/en/d/Jh2992e/#Jh2992e>
- 387 2. Systems P. Safety of Medicines in Sub-Saharan Africa. Assessment of  
388 Pharmacovigilance Systems and their Performance. Submitted to the US  
389 Agency for International Development by the Strengthening Pharmaceutical  
390 Program (SPS) Program. Who [Internet]. 2011;1–143. Available from:  
391 [apps.who.int/medicinedocs/documents/s19152en/s19152en.pdf](http://apps.who.int/medicinedocs/documents/s19152en/s19152en.pdf)
- 392 3. Nderitu, F W. Gikonyo NK and SKA. Detection and Management of Adverse  
393 Drug Reactions Related to Antiretroviral Drugs among HIV/AIDS Patients in  
394 Kiambu Sub-County, Kenya. East Cent African J Pharm Sci. 2013;16:3–12.
- 395 4. Masenyetse LJ, Manda SO, Mwambi HG. An assessment of adverse drug  
396 reactions among HIV positive patients receiving antiretroviral treatment in  
397 South Africa. AIDS Res Ther [Internet]. 2015;12(1):6. Available from:  
398 <http://www.aidsrestherapy.com/content/12/1/6%5Cnhttp://www.pubmedcentral>  
399 [.nih.gov/articlerender.fcgi?artid=4349753&tool=pmcentrez&rendertype=abstra](http://www.ncbi.nlm.nih.gov/articlerender.fcgi?artid=4349753&tool=pmcentrez&rendertype=abstract)  
400 [ct](http://www.ncbi.nlm.nih.gov/articlerender.fcgi?artid=4349753&tool=pmcentrez&rendertype=abstract)
- 401 5. Board BMA. Reporting adverse drug reactions A guide for healthcare  
402 professionals Reporting adverse drug reactions A guide for healthcare  
403 professionals. 2006;(May).
- 404 6. MCAZ. Zimbabwe National Pharmacovigilance Policy and Guidelines  
405 Handbook. 2013;(November):1–69.



- 406 7. Nemauro T, Dhoro M, Nhachi C, Kadzirange G, Chonzi P, Masimirembwa C.  
407 Evaluation of the prevalence, progression and severity of common adverse  
408 reactions (Lipodystrophy, CNS, peripheral neuropathy, and hypersensitivity  
409 reactions) associated with Anti-Retroviral Therapy (ART) and anti-tuberculosis  
410 treatment in outpatients in. *J AIDS Clin Res.* 2012;4(4).
- 411 8. R Hove. Pharmaceutical. 2011;
- 412 9. van Grootheest K, Olsson S, Couper M, de Jong-van den Berg L. Pharmacists'  
413 role in reporting adverse drug reactions in an international perspective.  
414 *Pharmacoepidemiol Drug Saf.* 2004;13(7):457–64.
- 415 10. Santosh KC, Tragulpiankit P, Gorsanan S, Edwards IR. Attitudes among  
416 healthcare professionals to the reporting of adverse drug reactions in Nepal.  
417 *BMC Pharmacol Toxicol* [Internet]. 2013;14:16. Available from:  
418 <http://www.ncbi.nlm.nih.gov/pubmed/23497690>  
419 [http://www.pubmedcentr  
al.nih.gov/articlerender.fcgi?artid=PMC3599543](http://www.pubmedcentral.nih.gov/articlerender.fcgi?artid=PMC3599543)
- 420 11. Backstrom M, Mjorndal T, Dahlqvist R, Nordkvist-Olsson T. Attitudes to  
421 reporting adverse drug reactions in northern Sweden. *Eur J Clin Pharmacol*  
422 [Internet]. 2000;56(9–10):729–32. Available from:  
423 [http://ovidsp.ovid.com/ovidweb.cgi?T=JS&CSC=Y&NEWS=N&PAGE=fullte  
424 xt&D=emed5&AN=2001096271](http://ovidsp.ovid.com/ovidweb.cgi?T=JS&CSC=Y&NEWS=N&PAGE=fulltext&D=emed5&AN=2001096271)  
425 [http://metalib.lib.ic.ac.uk:9003/sfx\\_loca  
l?sid=OVID&isbn=&issn=0031-6970&volume=56&issue=9-  
10&date=2000&title=European+Journal+of+Clinical+Pharmacology&atitle=A  
426 tti](http://metalib.lib.ic.ac.uk:9003/sfx_local?sid=OVID&isbn=&issn=0031-6970&volume=56&issue=9-10&date=2000&title=European+Journal+of+Clinical+Pharmacology&atitle=Attitudi)  
427 tti
- 428 12. WHO. The Safety of Medicines in Public health programmes:  
429 Pharmacovigilance an essential tool. *WHO Libr Cat Data* [Internet]. 2006;61.  
430 Available from:

- 431 [http://www.who.int/medicines/areas/quality\\_safety/safety\\_efficacy/Pharmacovi](http://www.who.int/medicines/areas/quality_safety/safety_efficacy/Pharmacovigilance_B.pdf)  
432 [gilance\\_B.pdf](http://www.who.int/medicines/areas/quality_safety/safety_efficacy/Pharmacovigilance_B.pdf)
- 433 13. M H, PM, Arthurs N, Jelly J. The spontaneous reporting of adverse drug  
434 reactions by nurses. *Br J Clin Pharmacol.* 1995;40:173–5.
- 435 14. Patidar D, Rajput MS, Nirmal NP, Savitri W. Implementation and evaluation of  
436 adverse drug reaction monitoring system in a tertiary care teaching hospital in  
437 Mumbai, India. *Interdiscip Toxicol* [Internet]. 2013;6(1):41–6. Available from:  
438 [http://www.pubmedcentral.nih.gov/articlerender.fcgi?artid=3795320&tool=pm](http://www.pubmedcentral.nih.gov/articlerender.fcgi?artid=3795320&tool=pmcentrez&rendertype=abstract)  
439 [centrez&rendertype=abstract](http://www.pubmedcentral.nih.gov/articlerender.fcgi?artid=3795320&tool=pmcentrez&rendertype=abstract)
- 440  
441  
442  
443

444 **Figure legend**

445 **Figure 1: The ARV ADR Surveillance Flow Diagram**

446 **Tables**

**Table 1: Demographic Characteristics of Study Participants, Harare City, Zimbabwe, 2017**

| <b>Characteristics</b>           | <b>Frequency n (%)</b>                                     | <b>n=52</b> |
|----------------------------------|------------------------------------------------------------|-------------|
| <b>Gender</b>                    |                                                            |             |
| Female                           | 38 (73)                                                    |             |
| Male                             | 14 (27)                                                    |             |
| <b>Designation</b>               |                                                            |             |
| Medical Doctors                  | 4(7)                                                       |             |
| Registered General Nurses (RGNs) | 39 (75)                                                    |             |
| Pharmacy Technicians             | 3 (6)                                                      |             |
| Primary Counsellors (PC)         | 6(12)                                                      |             |
| <b>Median Years in Service</b>   | 9 ( <u>Q<sub>1</sub></u> = 7 , <u>Q<sub>3</sub></u> = 12 ) |             |

447

448 RGN: Registered General Nurse

449 PC: Primary Counsellor

450 Q<sub>1</sub>: First Quartile

451 Q<sub>3</sub>: Third Quartile

452

453

454

455

456

457

458

459

460

**Table 2: Usefulness of the ARV Pharmacovigilance System, Harare, 2017**

| <b>Variable</b>                       | <b>Doctors (%)</b> | <b>Nurses (%)</b> | <b>Pharmacy Technicians (%)</b> | <b>Primary Counsellors (%)</b> |
|---------------------------------------|--------------------|-------------------|---------------------------------|--------------------------------|
| Data used in patient management (Yes) | 4 (100)            | 28 (71.8)         | 1 (33.3)                        | 3 (50)                         |
| ADR Meetings held (Yes)               | 0                  | 5 (12.8)          | 0                               | 2 (33.3)                       |
| Decisions based on ADR's (Yes)        | 4 (100)            | 38 (97.4)         | 3 (100)                         | 4 (66.7)                       |
| Thought ADR Surveillance is useful    | 4 (100)            | 39 (100)          | 3 (100)                         | 4 (66.7)                       |
| <b>Overall Usefulness Rating</b>      | <b>75%</b>         | <b>70.5%</b>      | <b>58.3%</b>                    | <b>54.2%</b>                   |

461

462 ADR: Adverse Drug Reaction

463

464

465

466

467

468

469

470

471

472

473

474

475

476

477

**Table 3: ADR Surveillance Sensitivity, Harare City, 2017**

| Pharmacovigilance indicator | Key Attribute Assessed                                                                                                                                       | Response and Value                                                                                  |
|-----------------------------|--------------------------------------------------------------------------------------------------------------------------------------------------------------|-----------------------------------------------------------------------------------------------------|
| CP1                         | Total number of ADR reports received in 2015                                                                                                                 | ICSRs(AEFIs, TSR, SAEs) received by the MCAZ = 642                                                  |
| CP1 a                       | Total number of ADR reports received in the previous year per 100 000 people in the population                                                               | 5/100 000                                                                                           |
| CP2                         | Number of reports (total @ 31/12/16) in the national database?                                                                                               | AEFIs = 331, TSR = 1563, SAEs = 361                                                                 |
| CP3                         | Percentage of total annual reports acknowledged/issued feedback?                                                                                             | 100%                                                                                                |
| CP4                         | Percentage of total reports subjected to causality assessment in the past year?                                                                              | 100%                                                                                                |
| CP5                         | Percentage of above committed to the WHO database?                                                                                                           | 86% of TSR reports received since Sept 2012 committed to VigiFlow                                   |
| CO1                         | Signals generated in the past 5 years by the pharmacovigilance center?                                                                                       | +1900 ADR's                                                                                         |
| CO2                         | Regulatory actions were taken in the preceding year                                                                                                          | 7 products were recalled                                                                            |
| P1                          | Percentage of health-care facilities that had a functional pharmacovigilance unit (i.e. submits $\geq 10$ reports annually to the pharmacovigilance center)? | Sept 2012 to Dec 2016 = 119 health facilities<br>2015 = 32 health facilities submitted ADR reports. |

478

479 CP: WHO Core Pharmacovigilance Indicator

480 CO: Core Outcome Indicator

481 P1: Complementary Process Indicators

482 ICSR: Individual Case Safety Report

483 AEFI: Adverse Event Following Immunization

484 TSR: Targeted Spontaneous Reporting System for Adverse Reactions

485 SAE: Serious Adverse Events

**Table 4: Reasons for the Low ARV ADR Case Detection, Harare, 2017**

| <b>Reason for Underreporting</b>                          | <b>Frequency n (%)</b> |
|-----------------------------------------------------------|------------------------|
| Lack of knowledge by health workers                       | 21 (40.4)              |
| Weak incident detection strategies                        | 33 (63.5)              |
| Unavailability of forms                                   | 44 (84.6)              |
| Health workers overwhelmed by other responsibilities      | 27(51.9)               |
| Lack of appreciation of the importance of reporting ADR's | 30(57.7)               |
| Non-response by MCAZ to reported ADR's                    | 46(88.5)               |

486

487



## Flow of Information in the ARV Pharmacovigilance System

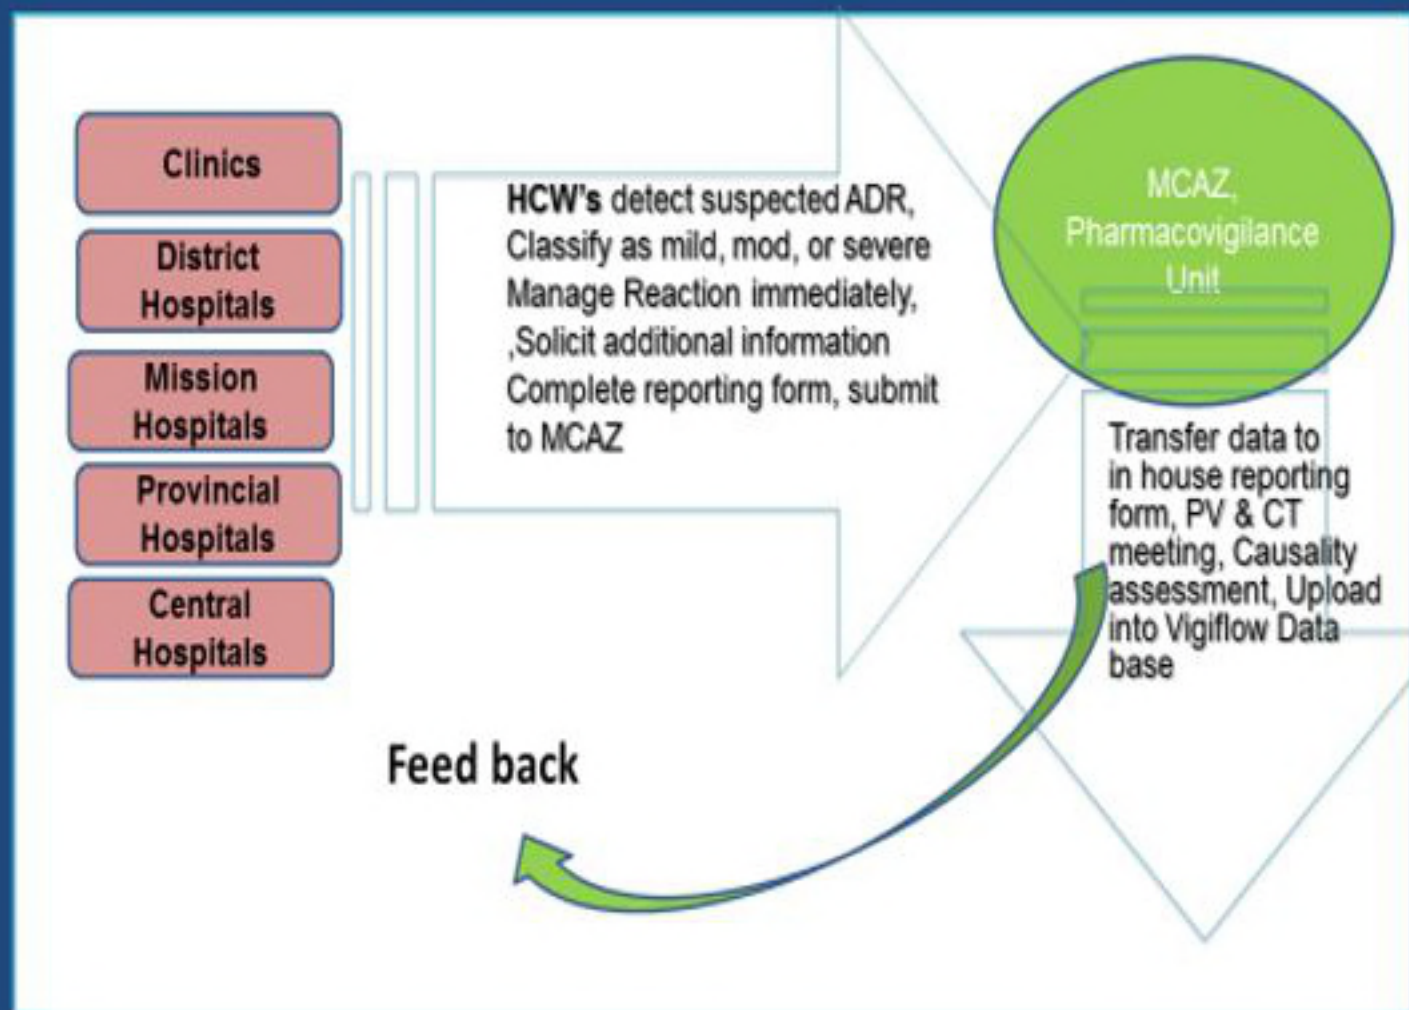

Figure 1: The ARV ADR Surveillance in Zimbabwe Flow Diagram
